# Supplementary material for: Assessing gender responsiveness of COVID-19 response plans for populations in conflict-affected humanitarian emergencies
Source: Confl Health. 2022 Feb 14;16:4. doi: 10.1186/s13031-022-00435-3 (PMC8842977; doi:10.1186/s13031-022-00435-3)
Supplement: Supplementary file 1 — Additional file 1. Supplementary - Indicators and Scores.xlsx/Full table of scored indicators. [file 13031_2022_435_MOESM1_ESM.xlsx]

## Sheet: ALL TABULATED
Country	Type of Plan	Reviewed By			Mention gender-based violence and related services?	Mention of gendered domestic labor?	Mention gendered and unpaid caregiving (informal)?	Mention of gendered health care workforce?	Mention gendered impacts on economy and income?	Mention gendered impacts on education?	Mention of sexual/reproductive health services?	Mention of engagement with women/girls' networks or feminist advocacy groups?	Mention of gender-sensitive data collection?	Mention of gender equality indicators?	Mention of mental health?	Mention of representation in decision making, planning, or implementation?	Mention of LGBTQI+ populations?	Mention needs of persons living with disabilities?	Mention of gender in relation to vaccination	Mention of the digital gender divide?	Gender Score
		Reviewer 1	Reviewer 2	Reviewer 3 (if applicable)	Step 1) Y/N for general category; Step 2) If mentioned, briefly describe how and whether (if any) considerations are made for gender	Household responsibilies: gathering supplies (water/firewood), home schooling children, etc. Y/N, if Y then briefly describe	Informal caregiving = women/girls' unpaid and informal caregiving to kin (i.e chid care, sick relatives, nannies). Y/N, if Y then briefly describe	Gendered health care workforce = health care professions that are predominatly occupied by women (nursing, personal support workers, midwives, community health workers). Inclusive of personal protective equipment (PPE) needs of women health care professionals. Y/N, if Y then briefly describe	Y/N, if Y then briefly describe	Y/N, if Y then briefly describe	Y/N, if Y then briefly describe	Y/N, if Y then briefly describe	Collecting or disaggregating data by gender, sex, gender identity, gender/sexual minorities, age, disability etc. Y/N, if Y then briefly desctibe	In relation to monitoring and evaluation?	Y/N, if Y then briefly desctibe	Gender parity, underrepresented minorities in health governance. Y/N, if Y then briefly describe	Y/N, if Y then briefly describe	Y/N, if Y then briefly describe	Y/N, if Y then briefly describe	Y/N, if Y then briefly describe	Gender-unequal, Gender-blind, Gender-sensitive, Gender-specific, Gender-transformative	Link to plan
Afghanistan	UN/International	KM	PB	N/A	Yes	Yes	Yes	Yes	Yes	Yes	Yes	Yes	Yes	Yes	Yes	Yes	No	Yes	No	Yes	Gender-specific	https://reliefweb.int/sites/reliefweb.int/files/resources/afg_hrp_2020_revision_june_2020.pdf
Bangladesh	UN/International	EH	ML	N/A	Yes	No	Yes	No	No	No	Yes	Yes	Yes	Yes	Yes	Yes	Yes	Yes	No	No	Gender-specific	https://reliefweb.int/sites/reliefweb.int/files/resources/covid-19_addendum_rohingya_refugee_response_020720_0.pdf
Cameroon	UN/International	KM	PB	N/A	Yes	Yes	Yes	Yes	Yes	Yes	Yes	Yes	Yes	Yes	Yes	Yes	Yes	Yes	No	Yes	Gender-specific	https://reliefweb.int/sites/reliefweb.int/files/resources/cmr_hrp_2020-revised_24062020_print.pdf
Colombia	National	CS	EH	N/A	Yes	No	No	No	No	No	Yes	No	No	No	Yes	No	Yes	Yes	No	No	Gender-sensitive	https://www.humanitarianresponse.info/sites/www.humanitarianresponse.info/files/documents/files/covid-19_response_plan_-_summary.pdf
Djibouti	UN/International	ML	EH	N/A	Yes	Yes	Yes	Yes	No	Yes	Yes	No	Yes	Yes	No	Yes	No	No	No	No	Gender-sensitive	https://reliefweb.int/sites/reliefweb.int/files/resources/DJI_COVID-19_Emergency_Appeal_21092020.pdf
DR Congo	UN/International	KM	PB	N/A	Yes	No	No	No	No	No	Yes	No	No	Yes	No	Yes	No	No	No	No	Gender-sensitive	http://documents1.worldbank.org/curated/en/349641585951020231/pdf/Congo-Democratic-Republic-of-COVID-19-Strategic-Preparedness-and-Response-Project.pdf
Egypt	UN/International	KM	PB	N/A	Yes	Yes	Yes	Yes	Yes	Yes	Yes	No	Yes	No	Yes	Yes	No	Yes	No	Yes	Gender-specific	https://unsdg.un.org/sites/default/files/2020-08/EGY_Socioeconomic-Response-Plan_2020.pdf Socio economic response with UN as well as https://egypt.un.org/sites/default/files/2020-09/COVID%2019%20Egypt%20Final.pdf Egypt COVID-19
Ethiopia	National	EH	CS	N/A	Yes	No	No	No	No	No	Yes	No	No	Yes	Yes	No	No	Yes	No	No	Gender-sensitive	https://www.ephi.gov.et/images/novel_coronavirus/Environmental-and-Social-Management-Framework-Ethiopia-COVID-19-Emergency-Response-Project-Disclosed.pdf
India	National	PB	KM	N/A	Yes	No	No	Yes	Yes	No	Yes	No	No	No	No	No	No	No	No	No	Gender-sensitive	https://nhm.gov.in/New_Updates_2018/COVID-19%20ER%26HSP%20PACKAGE/Guidance%20note_COVID%20package.pdf
Iran	National	PB	KM	N/A	No	No	No	No	No	No	No	Yes	No	No	No	No	No	No	No	No	Gender-blind	http://documents1.worldbank.org/curated/en/355851588064171417/pdf/Project-Information-Document-Iran-COVID-19-Emergency-Response-Project-P173994.pdf
Occupied Palestinian Territories	UN/International	PB	KM	N/A	Yes	No	No	No	Yes	No	No	No	No	No	No	No	No	Yes	No	No	Gender-sensitive	http://documents1.worldbank.org/curated/en/516311592587340048/pdf/Project-Information-Document-West-Bank-Emergency-Social-Protection-COVID-19-Response-Project-P174078.pdf
Kenya	National	EH	ML	KM	Yes	No	No	No	No	No	No	No	No	No	No	No	No	No	No	No	Gender-blind	https://www.health.go.ke/wp-content/uploads/2020/06/National-2019-Novel-Coronavirus-Contingency-Readiness-and-Early-Response-Plan-February-April-2020.pdf
Lebanon	UN/International	ML	CS	N/A	No	No	No	No	No	No	No	No	No	No	No	No	No	No	No	No	Gender-blind	https://www.unhcr.org/lb/wp-content/uploads/sites/16/2020/11/UNHCR-Covid-Response-Report_EN_October2020.pdf
Libya	UN/International	PB	KM	N/A	Yes	No	Yes	Yes	No	No	Yes	No	No	No	Yes	No	No	Yes	No	No	Gender-sensitive	https://www.unocha.org/sites/unocha/files/Global-Humanitarian-Response-Plan-COVID-19.pdf
Mali	UN/International	PB	KM	N/A	Yes	No	No	No	No	No	No	No	No	No	No	No	No	No	No	No	Gender-sensitive	http://documents1.worldbank.org/curated/en/115331609433084221/pdf/Disclosable-Version-of-the-ISR-MALI-COVID-19-EMERGENCY-RESPONSE-PROJECT-P173816-Sequence-No-02.pdf
Myanmar	National	EO	AP	CS	Yes	Yes	No	No	No	Yes	No	No	No	Yes	No	No	No	Yes	No	No	Gender-sensitive	https://themimu.info/sites/themimu.info/files/documents/Core_Doc_Myanmar_COVID-19_National_Response_Recovery_Plan_for_Education_Sector_May2020-Oct2021.pdf
Niger	UN/International	EO	AP	CS	Yes	No	No	No	Yes	No	Yes	No	Yes	No	Yes	No	No	No	No	No	Gender-sensitive	https://reliefweb.int/report/niger/unicef-niger-covid-19-situation-report-no-14-reporting-period-24-nov-31-dec-2020
Nigeria	National	EO	AP	CS	No	No	No	No	No	No	Yes	Yes	No	No	No	No	No	No	No	No	Gender-blind	https://www.alnap.org/system/files/content/resource/files/main/guide_on_phc_preparedness_and_response-covid-19.pdf
Pakistan	UN/International	EO	AP	CS	Yes	No	Yes	No	No	No	Yes	Yes	Yes	No	No	No	Yes	Yes	No	No	Gender-sensitive	https://reliefweb.int/sites/reliefweb.int/files/resources/PAKISTAN-Preparedness-and-Response-Plan-PPRP-COVID-19.pdf
Pakistan	National	EH	CS	ML	Yes	Yes	Yes	No	Yes	Yes	Yes	No	No	No	Yes	No	No	Yes	No	No	Gender-specific	https://reliefweb.int/sites/reliefweb.int/files/resources/globalhumanitresponseplancovid19-200510.v1.pdf
Philippines	National	EO	AP	CS	Yes	Yes	Yes	Yes	Yes	Yes	Yes	Yes	Yes	No	Yes	Yes	Yes	Yes	Yes	No	Gender-specific	https://doh.gov.ph/sites/default/files/basic-page/ESMF%2003172021.pdf
Saudi Arabia	National	EO	AP	CS	No	No	No	No	No	No	No	No	Yes	No	No	No	No	No	No	No	Gender-blind	https://www.moh.gov.sa/en/Ministry/MediaCenter/Publications/Documents/COVID-19-NATIONAL.pdf
Somalia	National	EO	AP	CS	No	No	No	No	No	No	No	No	No	No	No	No	No	No	No	No	Gender-blind	https://www.humanitarianresponse.info/sites/www.humanitarianresponse.info/files/documents/files/national_contingency_plan_for_preparedness_and_response_to_coronavirus_covid-19-_somalia.pdf
South Sudan	National	EO	AP	CS	Yes	No	Yes	No	No	No	No	No	No	No	No	No	No	No	No	No	Gender-sensitive	https://www.humanitarianresponse.info/fr/operations/south-sudan/document/south-sudan-national-covid-19-response-plan-nrp
Sudan	UN/International	CS	ML	YA	Yes	Yes	Yes	No	Yes	No	Yes	No	No	No	Yes	No	No	Yes	No	No	Gender-sensitive	https://www.humanitarianresponse.info/sites/www.humanitarianresponse.info/files/documents/files/sudan_covid-19_country_preparedness_and_response_plan_18-jul-2020.pdf
Syria	UN/International	EO	AP	N/A	Yes	Yes	Yes	Yes	Yes	Yes	Yes	Yes	Yes	Yes	Yes	Yes	Yes	Yes	No	No	Gender-sensitive	https://www.humanitarianresponse.info/sites/www.humanitarianresponse.info/files/documents/files/2020_syria_humanitarian_response_plan.pdf
Uganda	UN/International	ML	CS	N/A	Yes	Yes	Yes	No	Yes	No	Yes	No	Yes	Yes	Yes	Yes	Yes	Yes	No	No	Gender-specific	https://reliefweb.int/report/uganda/inter-agency-revised-uganda-country-refugee-response-plan-july-2020-december-2021
Ukraine	UN/International	EO	AP	N/A	Yes	No	No	No	No	No	No	No	No	No	Yes	Yes	No	No	No	No	Gender-sensitive	https://reliefweb.int/sites/reliefweb.int/files/resources/Ukraine%202020%20Humanitarian%20Response%20Plan%20to%20COVID-19.pdf
Yemen	National	EO	AP	CS	No	No	No	No	No	Yes	Yes	No	Yes	No	No	No	No	Yes	No	No	Gender-sensitive	http://planipolis.iiep.unesco.org/sites/planipolis/files/ressources/yemen_covid-19_moe_national_response_plan_5_june_2020.pdf
Zimbabwe	UN/International	EO	AP	CS	No	No	No	No	No	Yes	No	No	No	No	Yes	No	No	Yes	No	No	Gender-sensitive	http://planipolis.iiep.unesco.org/en/2020/zimbabwe-covid-19-preparedness-and-response-strategy-6942
				Yes	23	10	13	7	11	10	19	8	12	9	15	9	7	17	1	3	Gender Blind = 6
				No	7	20	17	22	19	20	11	22	18	21	15	20	23	13	29	27	Gender-sensitive = 17
				N/A	0	0	0	0	0	0	0	0	0	0	0	0	0	0	0	0	Gender-specific = 7
